# Supplementary material for: Multiple origins of prokaryotic and eukaryotic single-stranded DNA viruses from bacterial and archaeal plasmids
Source: Springer Nature journal article supplement (doi:10.1038/s41467-019-11433-0), 2019-07-31
Supplement: 41467_2019_11433_MOESM1_ESM.pdf [file 41467_2019_11433_MOESM1_ESM.pdf]

## **SUPPLEMENTARY INFORMATION**

### **Multiple origins of prokaryotic and eukaryotic single-stranded DNA viruses from bacterial plasmids**

Darius Kazlauskas<sup>1</sup>, Arvind Varsani<sup>2,3</sup>, Eugene V. Koonin<sup>4</sup>, Mart Krupovic<sup>5\*</sup>

<sup>1</sup> – Institute of Biotechnology, Life Sciences Center, Vilnius University, Saulėtekio av. 7, Vilnius 10257, Lithuania

<sup>2</sup> – The Biodesign Center for Fundamental and Applied Microbiomics, School of Life sciences, Center for Evolution and Medicine, Arizona State University, Tempe, AZ 85287, USA

<sup>3</sup> – Structural Biology Research Unit, Department of Integrative Biomedical Sciences, University of Cape Town, Rondebosch, 7700, Cape Town, South Africa

<sup>4</sup> – National Center for Biotechnology Information, National Library of Medicine. National Institutes of Health, Bethesda, MD 20894, USA

<sup>5</sup> – Institut Pasteur, Department of Microbiology, 25 rue du Docteur Roux, Paris 75015, France

\* - correspondence

E-mail: [krupovic@pasteur.fr](mailto:krupovic@pasteur.fr)

## SUPPLEMENTARY NOTE 1

### Analysis of bacterial mobile genetic elements encoding viral-like Reps

The majority of the Reps from pCRESS7 and pCRESS9, both represented in members of the phylum *Tenericutes*, are encoded by extrachromosomal plasmids (Supplementary table 1). By contrast, only 6 of the 237 (2.5%) Reps found in other groups are plasmid-borne (Supplementary table 1), with the rest being encoded in bacterial chromosomes. To characterize the provenance and potential function of these Reps, we performed a detailed genomic context analysis of selected genes from each Rep group. In the majority of cases, when the Reps were encoded on sufficiently large genomic contigs, the *rep* gene was located in the vicinity of a gene encoding an integrase of the tyrosine recombinase superfamily (Figure 2C). Further analysis showed that the loci encompassing the two genes as well as a variable number of other genes were flanked by direct repeats corresponding to the attachment sites (Supplementary figure 3a-i, Supplementary table 1), a typical feature of integration of circular dsDNA molecules mediated by tyrosine recombinases<sup>1</sup>. The majority of the analyzed mobile genetic elements were integrated into diverse tRNA genes. However, we also identified several elements integrated into protein-coding genes. For instance, elements encoding Reps from pCRESS2, -6 and -8 have recombined with the 3'-distal region of the gene encoding 30S ribosomal protein S9 (Supplementary table 1).

The Rep-encoding elements carry from 2 (e.g., plasmid pRGRH0065) to over 20 genes (e.g., element LacLac-E1; Supplementary figure 3). Despite this variability, based on the shared content of signature genes, the elements could be assigned to one of three families: (i) elements from Rep-based pCRESS1-3, -5, -8 and certain members of pCRESS6 share genes encoding FtsK-like DNA segregation ATPases (c128087), single-stranded DNA binding (SSB) proteins, and occasionally, Sec10/PgrA surface exclusion domain protein, which specifically inhibits the ability of cells to uptake homologous plasmids (IPR027607); (ii) elements from pCRESS4, -6 and -7 encode a conserved MOB<sub>V</sub>-family plasmid mobilization protein (PF01076); (iii) all elements carried by phytoplasma, irrespective of their placement in the Rep-based phylogeny, encode plasmid copy number control proteins<sup>2</sup>, a distinct SSB protein (PRK06752), and a conserved protein of unknown function (Figure 2C). Notably, none of the elements encoded any homologs of currently known viral structural proteins. Such pattern of gene sharing and incongruence with the Rep-based grouping (Figure 1) is consistent with the recombination and horizontal spread of these elements between different bacterial species. The latter conclusion is supported by phylogenetic analysis of the Rep sequences from each of the 9 pCRESS groups (Supplementary figure 3a-i). A notable case of horizontal plasmid transfer is observed in pCRESS7, where two elements found in alpha-proteobacteria and gamma-proteobacteria are nested among elements from *Clostridia*. Collectively, these observations indicate that viral-like Reps in bacteria are encoded by diverse extrachromosomal and integrated plasmids.

### Sequence motifs shared by bacterial and CRESS-DNA virus Reps

A detailed comparison of the conserved motifs in the nuclease and helicase domains of the viral-like bacterial and CRESS-DNA virus Reps (Figure 3) supports the inferences made from the clustering analysis (Figure 1). An asparagine in motif C of the helicase domain, which interacts with the  $\gamma$ -phosphate of ATP and a nucleophilic water molecule<sup>3</sup>, is conserved across all known CRESS-DNA viruses as well as the bacterial Reps of pCRESS2 and pCRESS3, but not in pCRESS1 or the YLxH supergroup. pCRESS3 bacterial Reps are most similar to those of smacoviruses, nanoviruses and circoviruses. Most notably, these proteins share the unique modification of the motif II, HUQ, in the nuclease domain, not found in other known prokaryotic plasmid or virus Reps. By contrast, algae-infecting bacilladnaviruses are more similar to the bacterial pCRESS2 Reps, especially within the helicase domain, where the conserved aspartate residues in the Walker B motif are replaced by glutamates. The uncultivated gastropod-associated circular DNA viruses (GasCSV) appear to be chimeric with respect to the nuclease and helicase domains. Whereas the former is more similar to the nuclease domain of circoviruses, the latter shows the highest similarity to the helicase domain of pCRESS2 bacterial Reps. A similar recombination hotspot between the two domains has been previously observed in many uncultivated CRESS-DNA viruses<sup>4,5</sup>. Sequence motifs of pCRESS9 and *P. pulchra* plasmid Reps are most closely similar to those of geminiviruses and genomoviruses. Furthermore, all Rep sequences in this assemblage share the GRS motif located between motifs II and III (Figure 3), which is not found in other CRESS-DNA viruses and is

thought to enable the appropriate spatial arrangement of motifs II and III <sup>6,7</sup>. Another synapomorphic character shared by geminiviruses, genomoviruses and pCRESS9 plasmids is the replacement of the arginine finger, which is conserved in the helicase domain of other CRESS-DNA viruses<sup>8</sup>, with an asparagine residue. Notably, in *P. pulchra* plasmids, the arginine finger motif is well-conserved, suggesting an ancestral position of this group with respect to geminiviruses, genomoviruses and pCRESS9.

### **Further phylogenetic and statistical validation of the Rep tree topology**

To test the robustness of the PhyML tree, we performed the following additional analyses: (i) maximum likelihood phylogenies were constructed using other methods, namely, RAxML and IQ-Tree, with alternative branch support methods, including the classical bootstrap and the more recently introduced ultrafast bootstrap procedures; (ii) phylogeny was reconstructed using the 20-profile mixture model which, similar to Bayesian CAT models but in the maximum likelihood framework, allows 20 substitution models along the sequences in the alignment<sup>9</sup>; (iii) statistical analysis of the unconstrained and 3 constrained tree topologies was performed. The IQ-Tree and RAxML trees had topologies nearly identical to the topology of the PhyML tree, although the branch support values estimated with the bootstrap procedure in RAxML tree were slightly lower than the aBayes and ultrafast bootstrap values for the PhyML and IQ-Tree trees, respectively. To account for potential differences in site-specific amino acid replacement patterns, we used the C20 mixture model, which yielded a topology nearly identical to that in the single-model maximum likelihood analyses (Figure 5 and Figure S5). To further scrutinize the robustness of the phylogenetic tree, we constructed a set of constrained trees with alternative topologies and compared these to the unconstrained tree using several statistical tests, including the approximately unbiased test<sup>10</sup>. All tests rejected the trees with alternative topologies (Supplementary table 2). Collectively, these results indicate that the obtained tree topology is highly robust and is likely to accurately reflect the evolutionary history of Reps encoded by CRESS-DNA viruses and plasmids.

## SUPPLEMENTARY TABLES

**Supplementary table 1.** Characterization of the integrated and extrachromosomal plasmids from pCRESS1-9, including information on their size, integration coordinates, integration targets, size of the attachment sites.

| Organism                                            | Plasmid/Element | Accession number | Coordinates      | Integration target       | att length | RC-Rep accession |
|-----------------------------------------------------|-----------------|------------------|------------------|--------------------------|------------|------------------|
| <b>pCRESS1</b>                                      |                 |                  |                  |                          |            |                  |
| Firmicutes; Clostridia; Clostridiales               |                 |                  |                  |                          |            |                  |
| Butyrivibrio sp. MB2005                             | ButMB-E1        | NZ_AUJP01000012  | 6964..14931      | tRNA-Gly                 | 33         | WP_026524352.1   |
| Firmicutes; Bacilli; Lactobacillales                |                 |                  |                  |                          |            |                  |
| Streptococcus anginosus DSM 20563                   | StrAng-E1       | NZ_KB891980      | 77855..88340     | Intergenic               | 24         | WP_003030931.1   |
| Streptococcus iniae YSFST01-82                      | StrIni-E1       | NZ_CP010783      | 1794043..1799231 | YbaB-like protein        | 13         | WP_003102166.1   |
| Streptococcus oralis ATCC 35037                     | StrOra-E1       | NZ_AEDW01000014  | 134347..143668   | Intergenic               | 16         | WP_000032131.1   |
| Streptococcus suis 10581                            | StrSui-E1       | NZ_ALKQ01000044  | 47978..60499     | FanG protien             | 88         | WP_029694263.1   |
| <b>pCRESS2</b>                                      |                 |                  |                  |                          |            |                  |
| Firmicutes; Clostridia; Clostridiales               |                 |                  |                  |                          |            |                  |
| Clostridium celerecrescens 152B c7                  | CloCel-E1       | NZ_JPME01000007  | 145850..156771   | tRNA-Gly                 | 24         | WP_038278663.1   |
| Clostridium citroniae WAL-17108                     | CloCit-E1       | NZ_JH376425      | 170718..179404   | tRNA-Gly                 | 20         | WP_007865724.1   |
| Clostridium methoxybenzovorans SR3                  | CloMet-E1       | NZ_ATXD01000006  | 2200538..2210845 | tRNA-Gly                 | 20         | WP_024346025.1   |
| Clostridium viride DSM 6836                         | CloVir-E1       | NZ_JHZO01000006  | 39765..67907     | 30S ribosomal protein S9 | 14         | WP_051546484.1   |
| Lachnospiraceae bacterium 6 1 63FAA                 | LacBac6.1-E1    | NZ_GL890549      | 384948..394690   | Intergenic               | 32         | WP_009246639.1   |
| Roseburia inulinivorans DSM 16841                   | RosInu-E1       | NZ_ACFY01000152  | 42399..50222     | SAM methylase            | 34         | WP_044928503.1   |
| Hungatella hathewayi                                | HugHat-E1       | CZAZ01000001     | 167507..174549   | Intergenic               | 16         | CUP05665.1       |
| Ruminococcus sp. 5 1 39BFAA                         | Rum51-E1        | ACII02000003     | 33727..44938     | tRNA-Trp                 | 41         | EES75484.2       |
| Ruminococcus sp. CAG 108                            | RumCAG-E1       | NZ_HF987453      | 47135..59333     | tRNA-Trp                 | 45         | WP_021882760.1   |
| Firmicutes; Erysipelotrichia; Erysipelotrichales    |                 |                  |                  |                          |            |                  |
| Erysipelothrix rhusiopathiae str. Fujisawa          | EryRhu-E1       | AP012027         | 1352967..1361071 | GMP synthase             | 15         | BAK32345.1       |
| Solobacterium moorei DSM 22971                      | SolMoo-E1       | NZ_AUKY01000086  | 6149..9424       | tRNA-Ala                 | 15         | WP_037404274.1   |
| Tenericutes; Mollicutes                             |                 |                  |                  |                          |            |                  |
| Mollicutes bacterium HR2                            | MolHR2-E1       | NZ_JRFF01000028  | 15562..27894     | tRNA-Arg                 | 56         | WP_036328238.1   |
| <b>pCRESS3</b>                                      |                 |                  |                  |                          |            |                  |
| Actinobacteria; Actinobacteria; Propionibacteriales |                 |                  |                  |                          |            |                  |
| Propionibacterium acnes HL005PA4                    | ProAcn-E1       | NZ_GL383162      | 76237..81150     | tRNA-Pro                 | 18         | WP_002529618.1   |
| Actinobacteria; Actinobacteridae; Actinomycetales   |                 |                  |                  |                          |            |                  |
| Mobiluncus mulieris ATCC 35243                      | MobMul-E1       | NZ_GG668519      | 73683..78607     | tRNA-Val                 | 23         | WP_036342632.1   |
| Actinobacteria; Actinobacteridae; Bifidobacteriales |                 |                  |                  |                          |            |                  |
| Alloscardovia omnicolens DSM 21503                  | AllOmni-E1      | NZ_ATVB01000007  | 45220..53134     | tRNA-Ala                 | 19         | WP_022856850.1   |
| Bifidobacterium pseudocatenulatum                   | p4M             | NC_003527        | N/A              |                          |            | NP_613078.1      |
| Bifidobacterium pullorum LMG 21816                  | BifPul-E1       | NZ_JGZJ01000010  | 37044..44621     | tRNA-Ala                 | 51         | WP_043170238.1   |
| Bifidobacterium longum                              | BifLon-E1       | NZ_JNVX01000024  | 104187..111387   | tRNA-Ala                 | 35         | WP_021975256.1   |
| <b>pCRESS4</b>                                      |                 |                  |                  |                          |            |                  |
| Firmicutes; Clostridia; Clostridiales               |                 |                  |                  |                          |            |                  |
| Ruminococcus sp. CAG:488                            | RumCAG-E1       | CBBI010000010    | 34399..48707     | tRNA-Arg                 | 50         | CDA18875.1       |
| unclassified                                        |                 |                  |                  |                          |            |                  |
| uncultured prokaryote                               | pRGRH0065       | LN852756         | N/A              |                          |            | CRY93789.1       |
| uncultured prokaryote                               | pRGFK1613       | LN854124         | N/A              |                          |            | CRY97508.1       |
| Actinobacteria; Corynebacteriales                   |                 |                  |                  |                          |            |                  |
| Gordonia mалаquae NBRC 108250                       | GorMal-E1       | BAOP01000004     | 266143..277064   | intergenic               | 36         | GAC78794.1       |
| <b>pCRESS5</b>                                      |                 |                  |                  |                          |            |                  |
| Firmicutes; Bacilli; Lactobacillales                |                 |                  |                  |                          |            |                  |

|                                                                    |               |                 |                  |                          |     |                |
|--------------------------------------------------------------------|---------------|-----------------|------------------|--------------------------|-----|----------------|
| <i>Streptococcus suis</i> 92-1400                                  | StrSui-E1     | NZ_ALLO01000011 | 691..6646        | tRNA-Leu                 | 50  | WP_024399566.1 |
| <i>Streptococcus</i> sp. SR1                                       | StrSR1-E1     | NZ_JATR01000010 | 946..12807       | tRNA-Leu                 | 15  | WP_033583888.1 |
| <i>Streptococcus oralis</i> strain 727_SORA 19_27736_643863        | StrOra-E1     | NZ_JUVM01000007 | 17067..27612     | tRNA-Leu                 | 13  | WP_049478725.1 |
| <i>Lactococcus garvieae</i> II 13                                  | LacGar-E1     | NZ_AMFD01000003 | 12360..23367     | Intergenic               | 31  | WP_017368666.1 |
| <b>pCRESS6</b>                                                     |               |                 |                  |                          |     |                |
| Firmicutes; Bacilli; Lactobacillales                               |               |                 |                  |                          |     |                |
| <i>Enterococcus faecium</i> strain LMG 8148                        | EntFae-E1     | NZ_LOHT01000285 | 29084..38080     | 30S ribosomal protein S9 | 25  | WP_061343647.1 |
| <i>Lactococcus lactis</i> subsp. <i>lactis</i>                     | LacLac-E1     | NZ_JNLP01000001 | 1815245..1831903 | tRNA-Leu                 | 50  | WP_032941943.1 |
| <i>Lactococcus lactis</i> subsp. <i>cremoris</i> A76               | pQA504        | CP003136        | N/A              |                          |     | AEU41945.1     |
| <i>Streptococcus suis</i> YS39                                     | StrSuiYS39-E1 | NZ_ALMO01000016 | 34857..43776     | Intergenic               | 22  | WP_024400359.1 |
| Firmicutes; Clostridia; Clostridiales                              |               |                 |                  |                          |     |                |
| <i>Butyrivibrio</i> sp. XPD2006 G590                               | ButXPD-E1     | NZ_ATVT01000008 | 119846..125578   | tRNA-Leu                 | 20  | WP_022765681.1 |
| <b>pCRESS7</b>                                                     |               |                 |                  |                          |     |                |
| Firmicutes; Clostridia; Clostridiales                              |               |                 |                  |                          |     |                |
| <i>Clostridium bolteae</i> 90B3                                    | CloBol-E1     | NZ_KB851181     | 29144..34918     | Intergenic               | 21  | WP_002578150.1 |
| Proteobacteria; Gammaproteobacteria; Vibrionales                   |               |                 |                  |                          |     |                |
| <i>Vibrio anguillarum</i> RV22                                     | VibAng-E1     | NZ_AEZB01000083 | 1220..7071       | Intergenic               | 13  | WP_019282500.1 |
| Tenericutes; Mollicutes; Achleplasmatales                          |               |                 |                  |                          |     |                |
| Aster yellows witches'-broom phytoplasma AYWB                      | pAYWB-II      | CP000063        | N/A              |                          |     | ABC65794.1     |
| Aster yellows witches'-broom phytoplasma AYWB                      | pAYWB-IV      | CP000065        | N/A              |                          |     | ABC65805.1     |
| <i>Ca. Phytoplasma australiense</i>                                | pCPa          | NC_010918       | N/A              |                          |     | YP_001966814.1 |
| Onion yellows phytoplasma OY-M                                     | OniYel-E1     | NC_005303       | 756287..761444   | Intergenic               | 46  | WP_011161011.1 |
| Periwinkle leaf yellowing phytoplasma                              | p09PLY-1      | NC_019244       | N/A              |                          |     | YP_006961027.1 |
| Periwinkle leaf yellowing phytoplasma                              | p09PLY-2      | NC_019247       | N/A              |                          |     | YP_006961042.1 |
| <i>Rehmannia glutinosa</i> ' phytoplasma                           | pPARG1        | NC_014123       | N/A              |                          |     | YP_003617079.1 |
| Proteobacteria; Alphaproteobacteria; Rhodospirillales              |               |                 |                  |                          |     |                |
| <i>Acidiphilium</i> sp. CAG:727                                    | AciCAG-E1     | FR898463        | 2638..14917      | Intergenic               | 16  | CDE19587.1     |
| <b>pCRESS8</b>                                                     |               |                 |                  |                          |     |                |
| Firmicutes; Bacilli; Lactobacillales                               |               |                 |                  |                          |     |                |
| <i>Lactobacillus mucosae</i> LM1                                   | LacMuc-E1     | NZ_CP011013     | 2081576..2091749 | tRNA-Thr                 | 102 | WP_006499656.1 |
| <i>Lactobacillus reuteri</i> 100-23                                | LacReu-E1     | NZ_AAPZ02000001 | 1366292..1380782 | tRNA-Thr                 | 23  | WP_003665528.1 |
| <i>Leuconostoc mesenteroides</i> subsp. <i>cremoris</i> ATCC 19254 | LeuMes-E1     | NZ_GG693387     | 185148..195379   | Ribosomal protein S9     | 18  | WP_036093565.1 |
| <i>Oenococcus oeni</i> DSM 20252                                   | OenOen-E1     | NZ_AQVA01000012 | 15290..30347     | tRNA-Leu                 | 18  | WP_002821392.1 |
| <i>Streptococcus mitis</i> SK629                                   | StrMit-E1     | NZ_JPFU01000002 | 82438..92128     | Intergenic               | 24  | WP_042900192.1 |
| <i>Lactobacillus taiwanensis</i> DSM 21401                         | LacTai-E1     | AYZG01000001    | 4476..14624      | 30S ribosomal protein S9 | 21  | KRN00682.1     |
| <i>Lactobacillus amylovorus</i> DSM 16698                          | LacAmy-E1     | NZ_JQBQ01000011 | 3735..15652      | tRNA-Thr                 | 14  | WP_056985318.1 |
| <i>Enterococcus faecalis</i> F01966                                | EntFae-E1     | NZ_KE351541     | 26540..37054     | 30S ribosomal protein S9 | 51  | WP_016622553.1 |
| <i>Lactobacillus vaginalis</i>                                     | pC107         | KP172590        | N/A              |                          |     | AKG47101.1     |
| Firmicutes; Bacilli; Bacillales                                    |               |                 |                  |                          |     |                |
| <i>Staphylococcus epidermidis</i>                                  | pSAP110B      | NC_013384       | N/A              |                          |     | YP_006939186.1 |
| <i>Viridibacillus arenosi</i> FSL R5-213                           | VirAre-E1     | NZ_ASQA01000035 | 81188..94595     | Intergenic               | 26  | WP_051448806.1 |
| <b>pCRESS9</b>                                                     |               |                 |                  |                          |     |                |
| Tenericutes; Mollicutes; Achleplasmatales                          |               |                 |                  |                          |     |                |
| Onion yellows phytoplasma                                          | pEcOYNIM      | NC_019167       | N/A              |                          |     | YP_006959585.1 |
| <i>Paulownia</i> witches'-broom phytoplasma                        | pPaWBNy-1     | NC_010405       | N/A              |                          |     | YP_001708784.1 |
| <i>Paulownia</i> witches'-broom phytoplasma                        | pPaWBNy-2     | NC_010406       | N/A              |                          |     | YP_001708790.1 |
| Periwinkle little leaf phytoplasma                                 | pPLLHn-1      | NC_019290       | N/A              |                          |     | YP_006961991.1 |
| Wheat blue dwarf phytoplasma                                       | pWBD1         | NC_019535       | N/A              |                          |     | YP_007008175.1 |

|                                                 |         |           |     |                |
|-------------------------------------------------|---------|-----------|-----|----------------|
| Wheat blue dwarf phytoplasma                    | pWBD3   | NC_019536 | N/A | YP_007008179.1 |
| Candidatus Phytoplasma australiense             | pPAPh2  | NC_010854 | N/A | YP_001965305.1 |
| Candidatus Phytoplasma australiense             | pPASb11 | NC_010856 | N/A | YP_001965310.1 |
| Aster yellows witches'-broom phytoplasma AYWB   | pAYWB-I | NC_007717 | N/A | WP_011412950.1 |
| <b>P. pulchra-like</b>                          |         |           |     |                |
| Eukaryota; Rhodophyta; Bangiophyceae; Bangiales |         |           |     |                |
| Pyropia pulchra                                 | plasmid | AF106327  | N/A | AAF36423.1     |
| Pyropia pulchra                                 | plasmid | AF106328  | N/A | AAF36424.1     |
| Pyropia pulchra                                 | plasmid | AF106326  | N/A | AAF36422.1     |

**Supplementary table 2.** Topology testing for the phylogenetic tree of Rep proteins.

| Tree     | AU <sup>1</sup> | deltaL <sup>2</sup> | RELL <sup>3</sup> | KH <sup>4</sup> | SH <sup>5</sup> | WKH <sup>6</sup> | WSH <sup>7</sup> | ELW <sup>8</sup> |
|----------|-----------------|---------------------|-------------------|-----------------|-----------------|------------------|------------------|------------------|
| 1 (Unc.) | 0.998           | 0                   | 0.998             | 0.998           | 1               | 0.998            | 1                | 0.998            |
| 2        | 0.00291         | 254.27              | 0.00212           | 0.00233         | 0.00375         | 0.00233          | 0.00618          | 0.00214          |
| 3        | 0.000864        | 287.83              | 0.0003            | 0.00046         | 0.00057         | 0.00046          | 0.00154          | 0.000308         |
| 4        | 4.47E-15        | 569.37              | 0                 | 0               | 0               | 0                | 0                | 1.93E-61         |

Tree 1: Unconstrained topology;

Tree 2: plasmids and viruses form two monophyletic groups;

Tree 3: positions of the geminivirus/genomovirus clade and that including all other CRESS-DNA viruses are switched;

Tree 4: regrouped according to the host organisms, i.e., branch including plant-associated geminiviruses and genomoviruses is moved as a sister group to plant-associated nanoviruses/alphasatellites, animal-associated smacoviruses are grouped with circoviruses, whereas other unclassified groups of CRESS-DNA viruses are monophyletic.

1 p-value of approximately unbiased (AU) test.

2 logL difference from the maximal logl in the set.

3 bootstrap proportion using REML method.

4 p-value of one sided Kishino-Hasegawa test.

5 p-value of Shimodaira-Hasegawa test.

6 p-value of weighted KH test.

7 p-value of weighted SH test.

8 Expected Likelihood Weight.

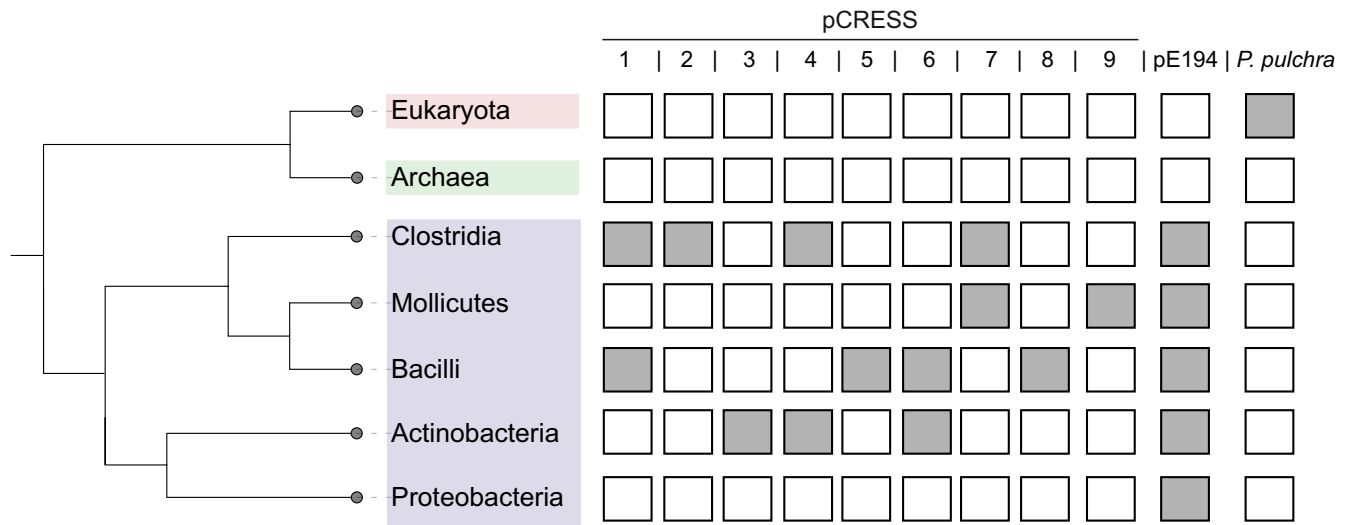

**Supplementary figure 1.** Taxonomic distribution of bacterial Rep proteins and their homologs. Tree of life was adopted from iTOL (<https://itol.embl.de/>). To get more robust view of taxonomic distribution and to dismiss recent horizontal transfers, taxa containing less than three species were filtered out.

a)

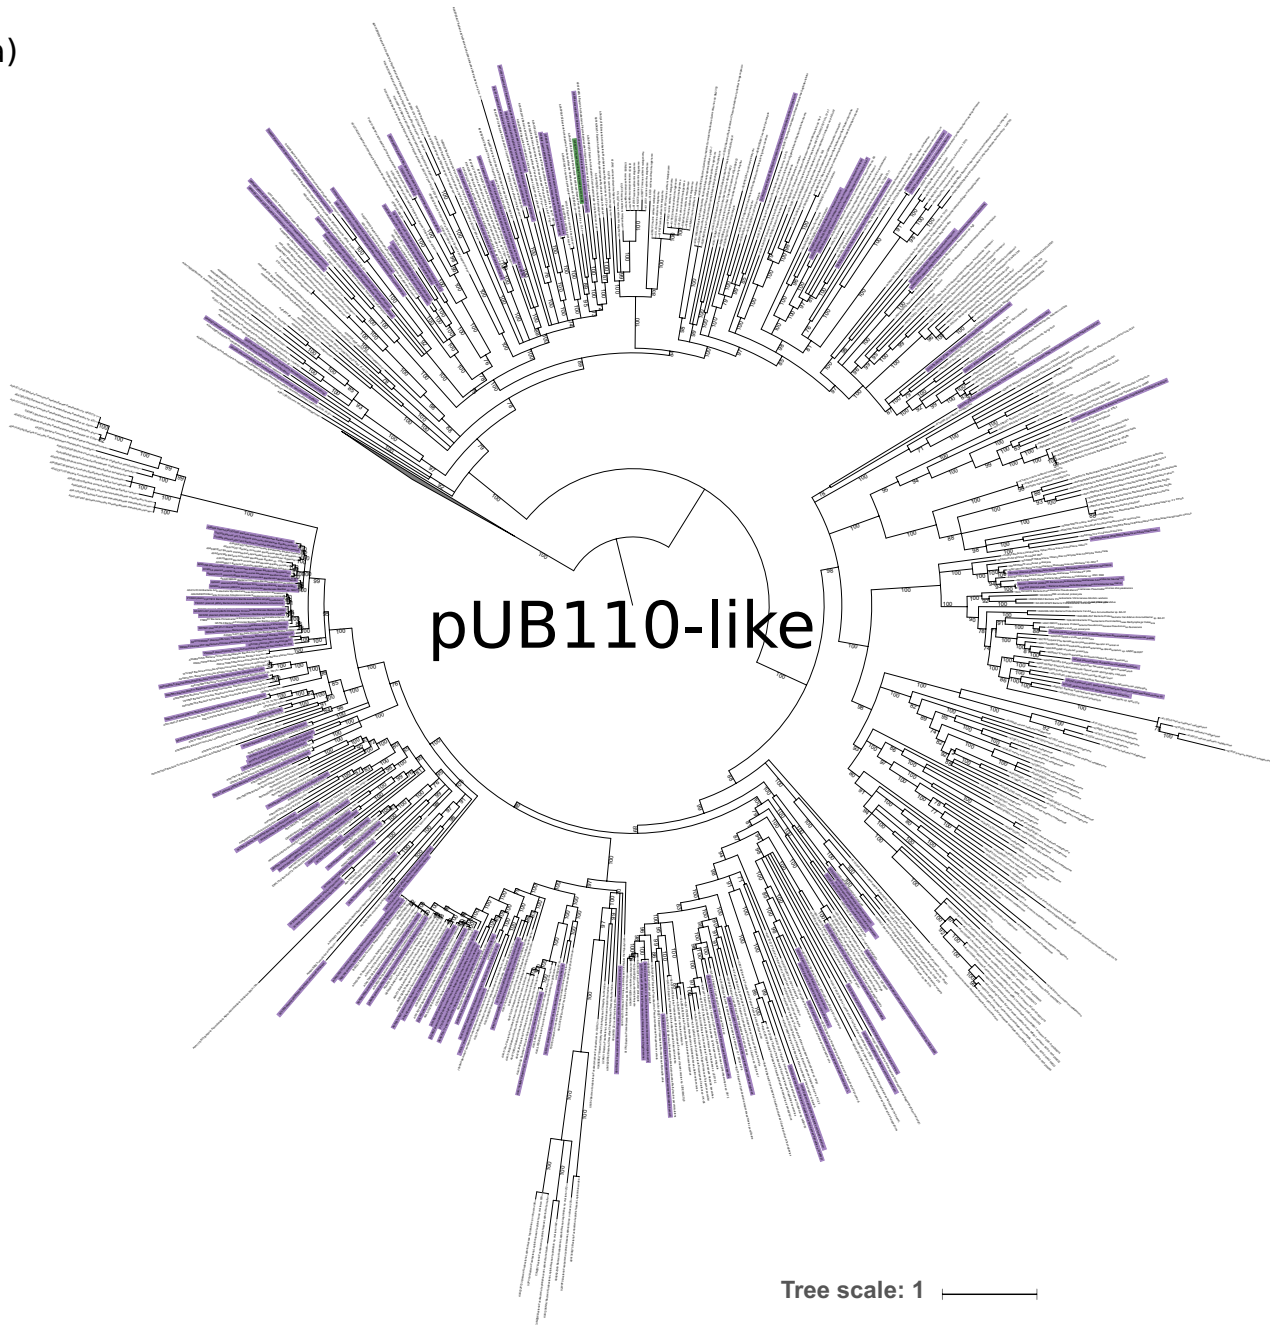



b)

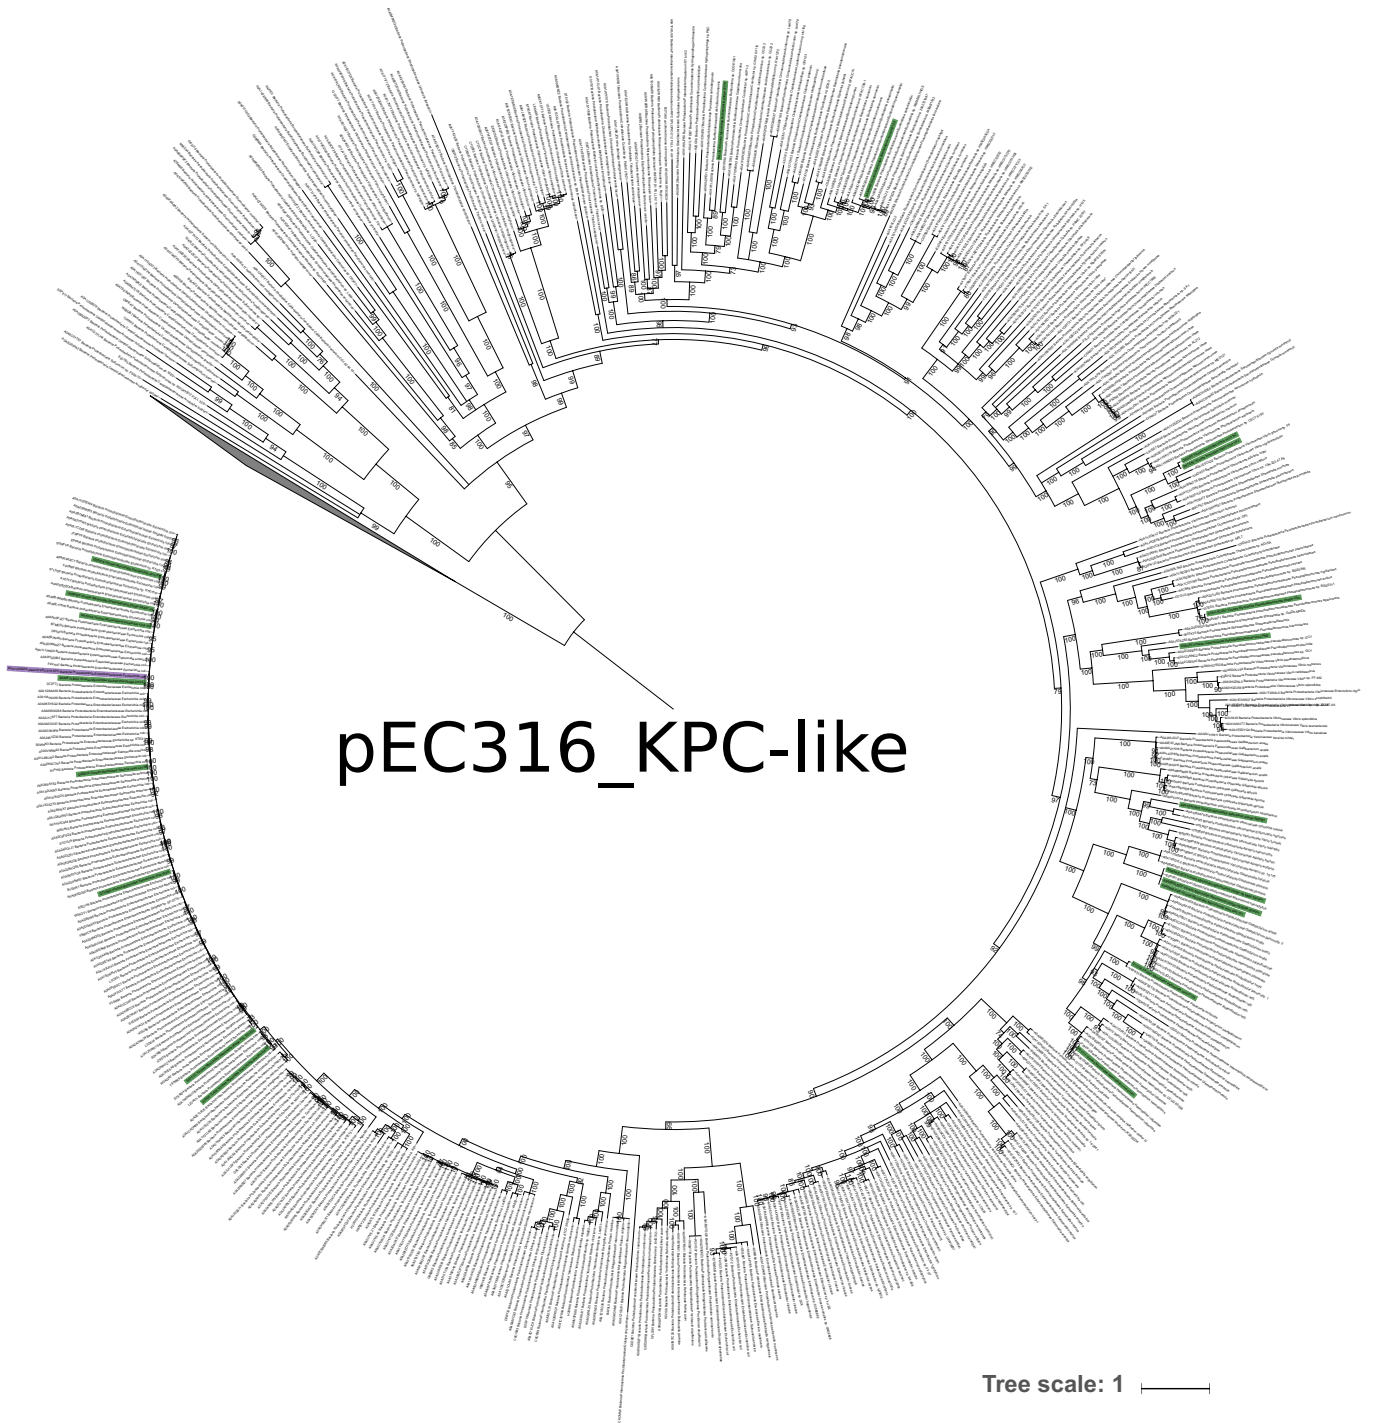

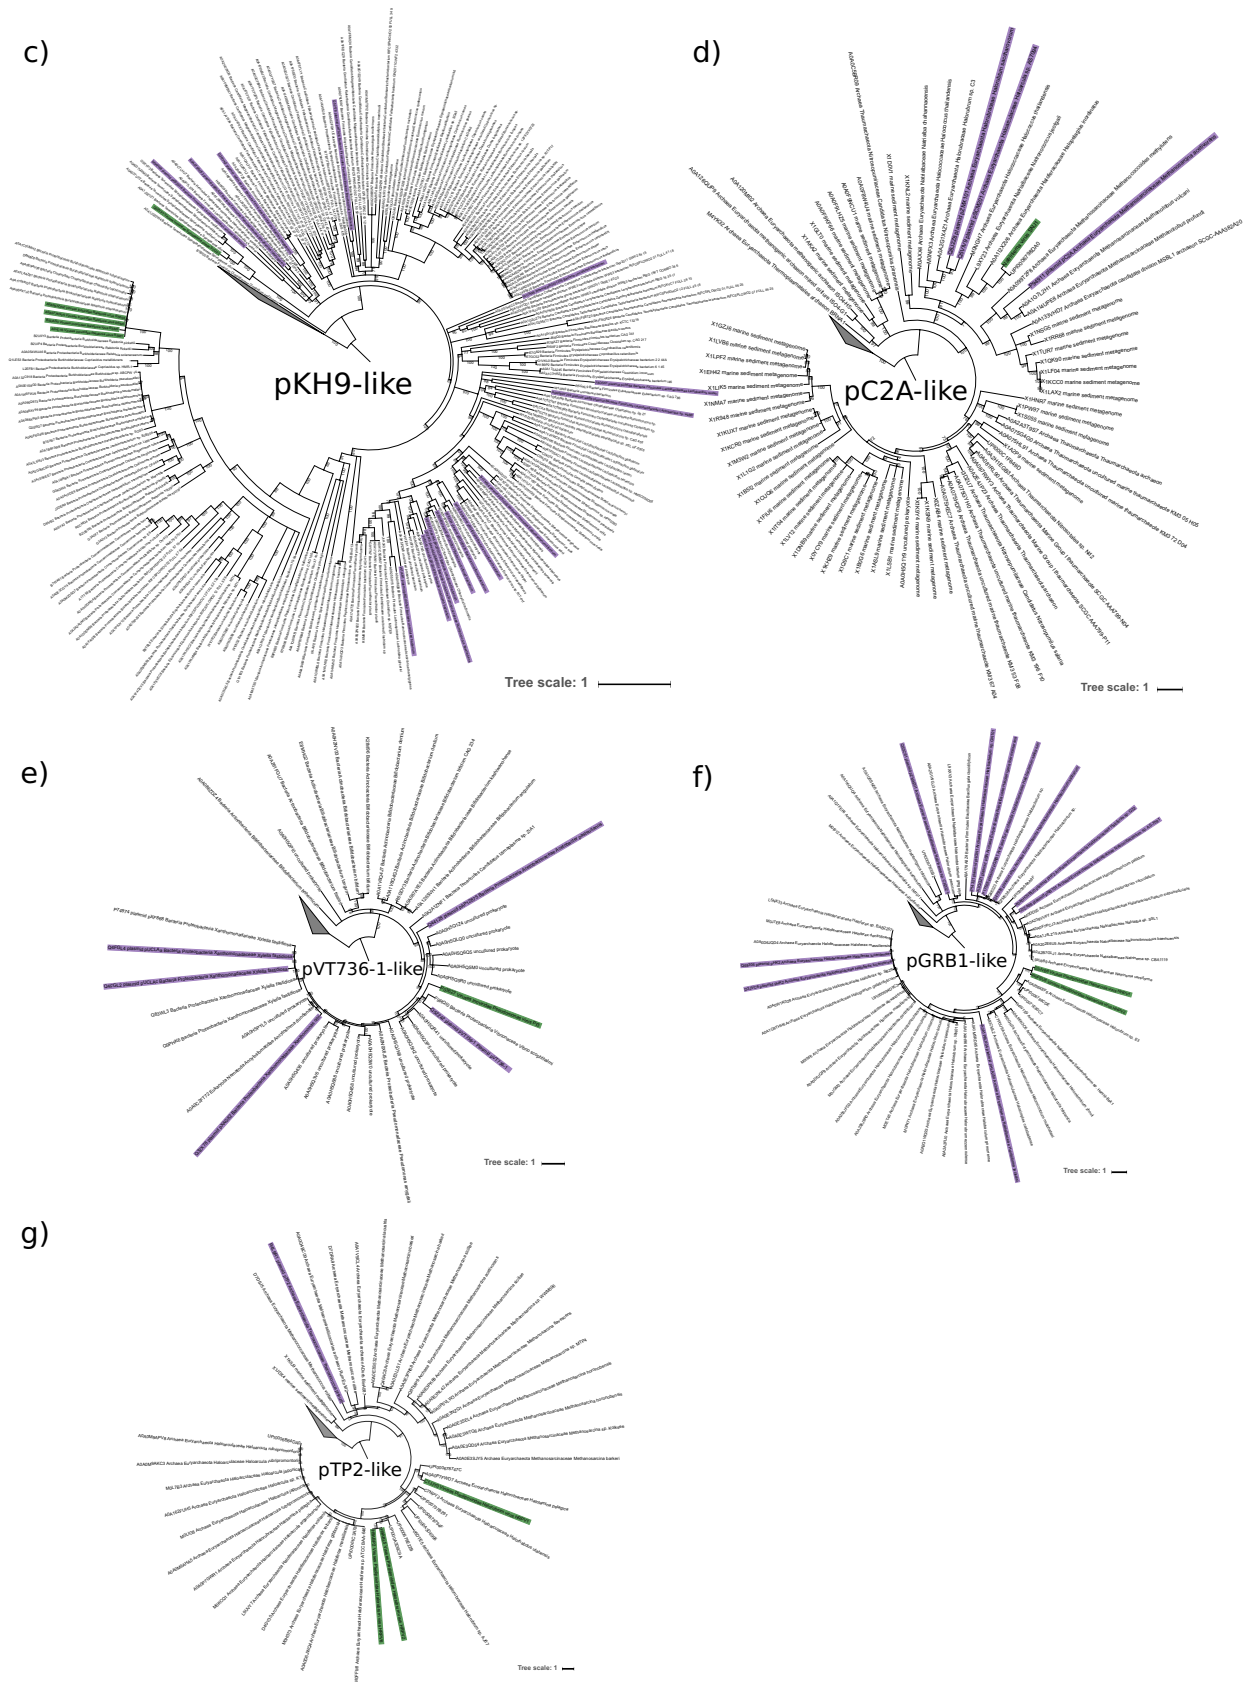

**Supplementary figure 2.** Maximum likelihood phylogenetic trees of Rep proteins from the 7 clusters (a-g) from supercluster 1 including both viral and plasmid sequences. Viral and plasmid sequences are highlighted on green and magenta backgrounds, respectively. All branches are labeled with the accession numbers of the sequences and taxonomy of the corresponding taxa.

### a) pCRESS1

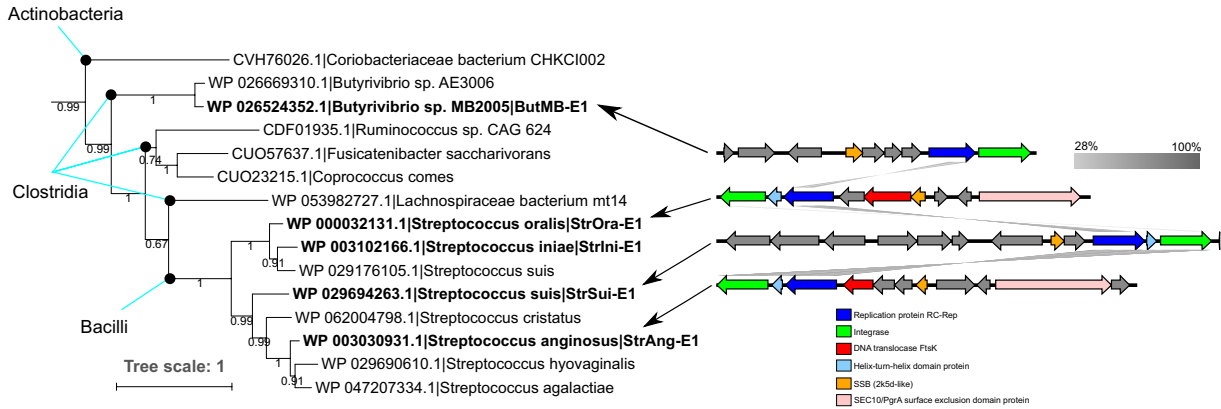

### b) pCRESS2

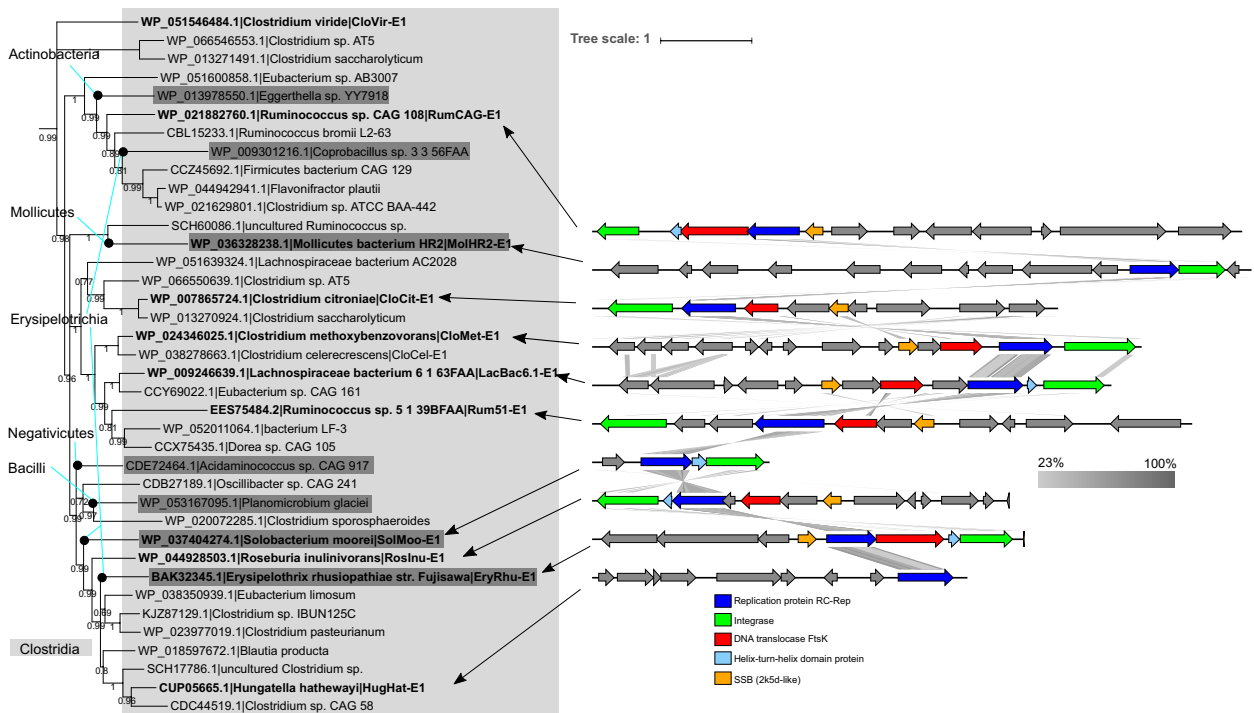

### c) pCRESS3

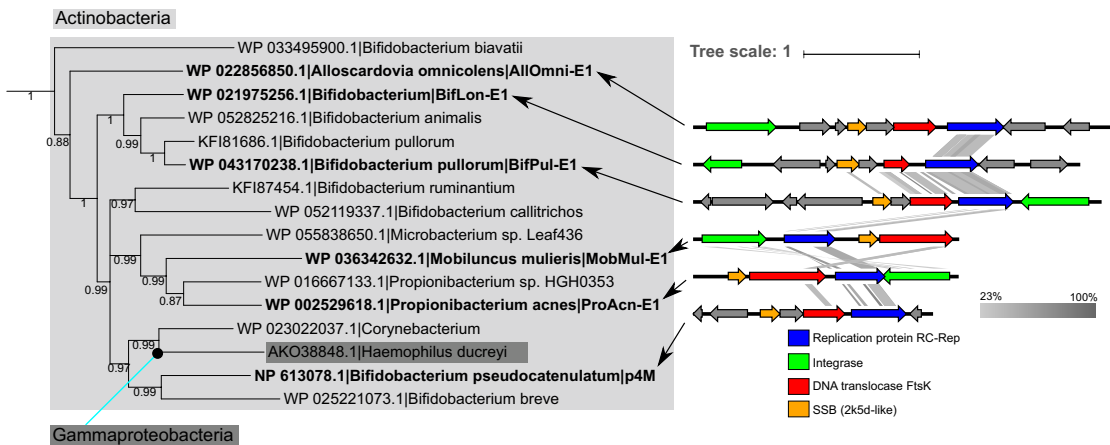

d) pCRESS4

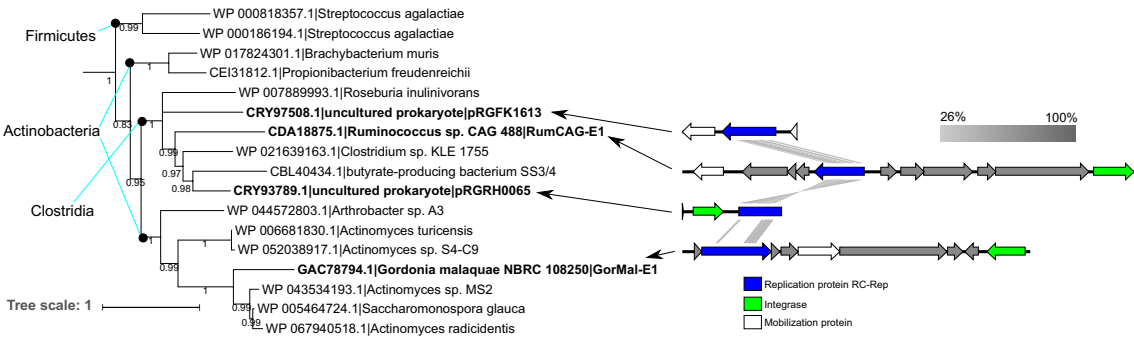

e) pCRESS5

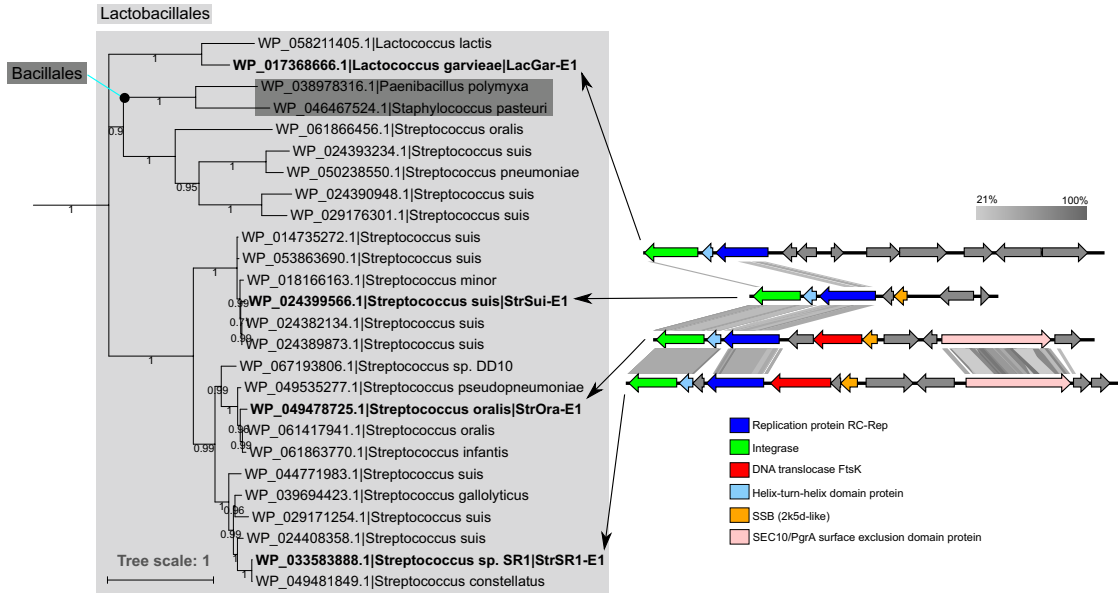

f) pCRESS6

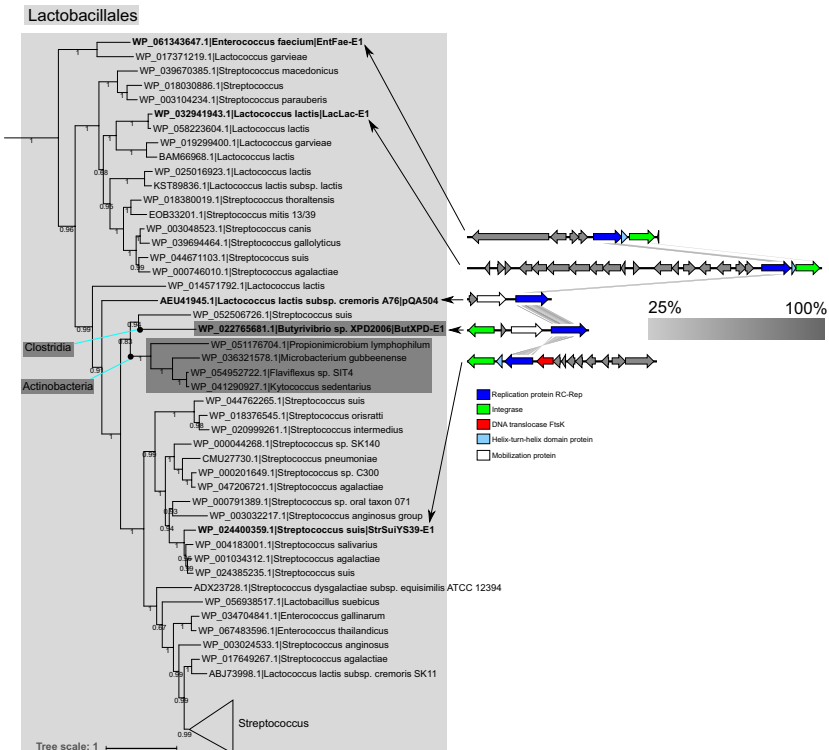



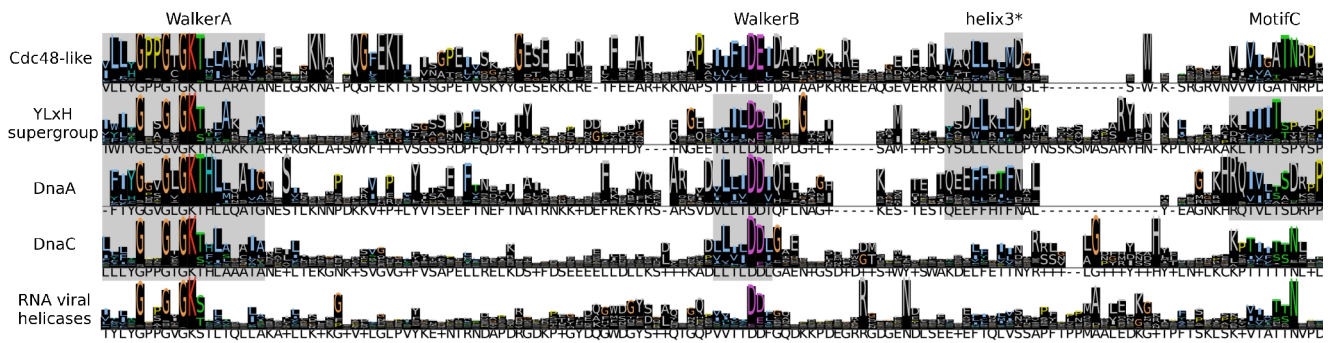

**Supplementary figure 4.** Comparison of the sequence motifs from AAA+ ATPases and superfamily 3 helicase domains. Similar motifs are shown in grey background.

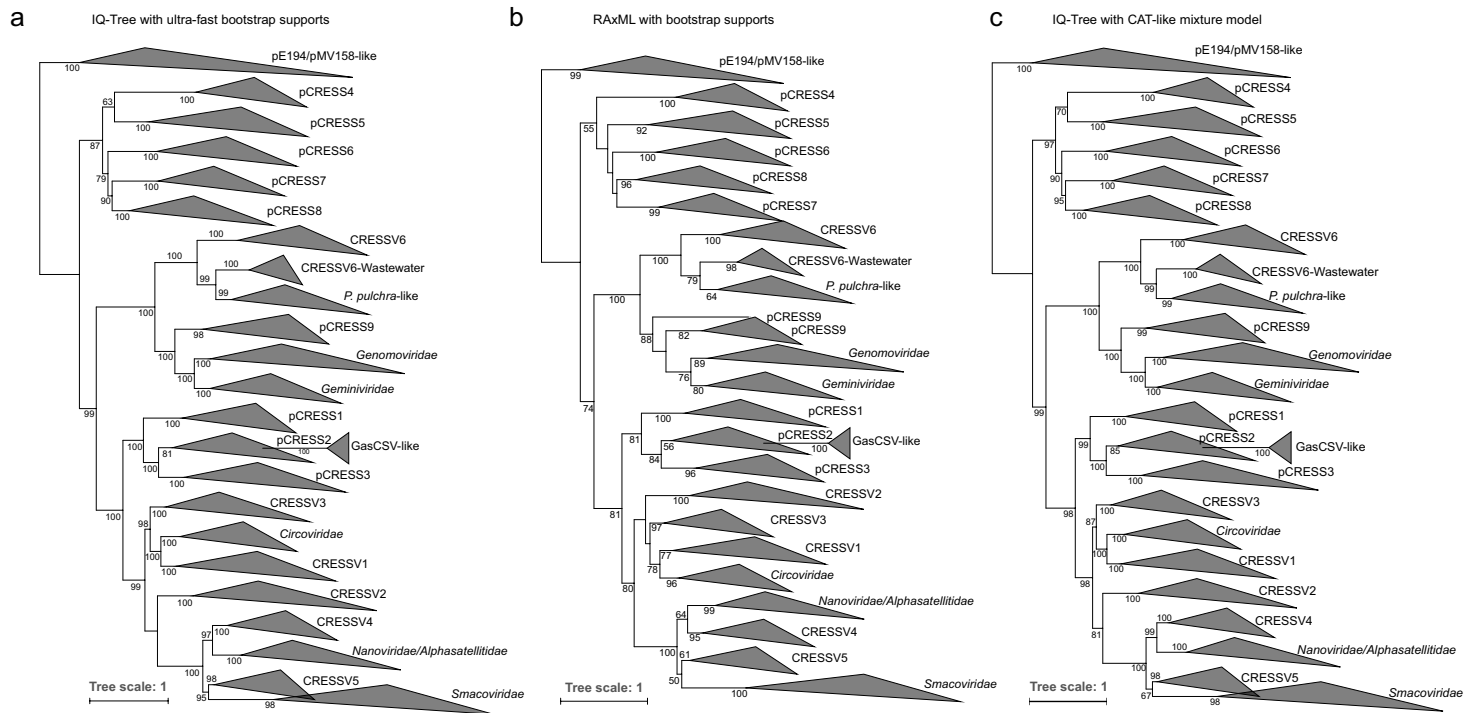

**Supplementary figure 5.** Maximum likelihood phylogenetic trees of Rep proteins. a) IQ-Tree phylogeny with ultra-fast bootstrap supports. b) RAxML phylogeny with bootstrap branch supports. c) IQ-Tree phylogeny reconstructed using the 20-profile mixture model (C20) which allows 20 substitution models along the sequences in the alignment.

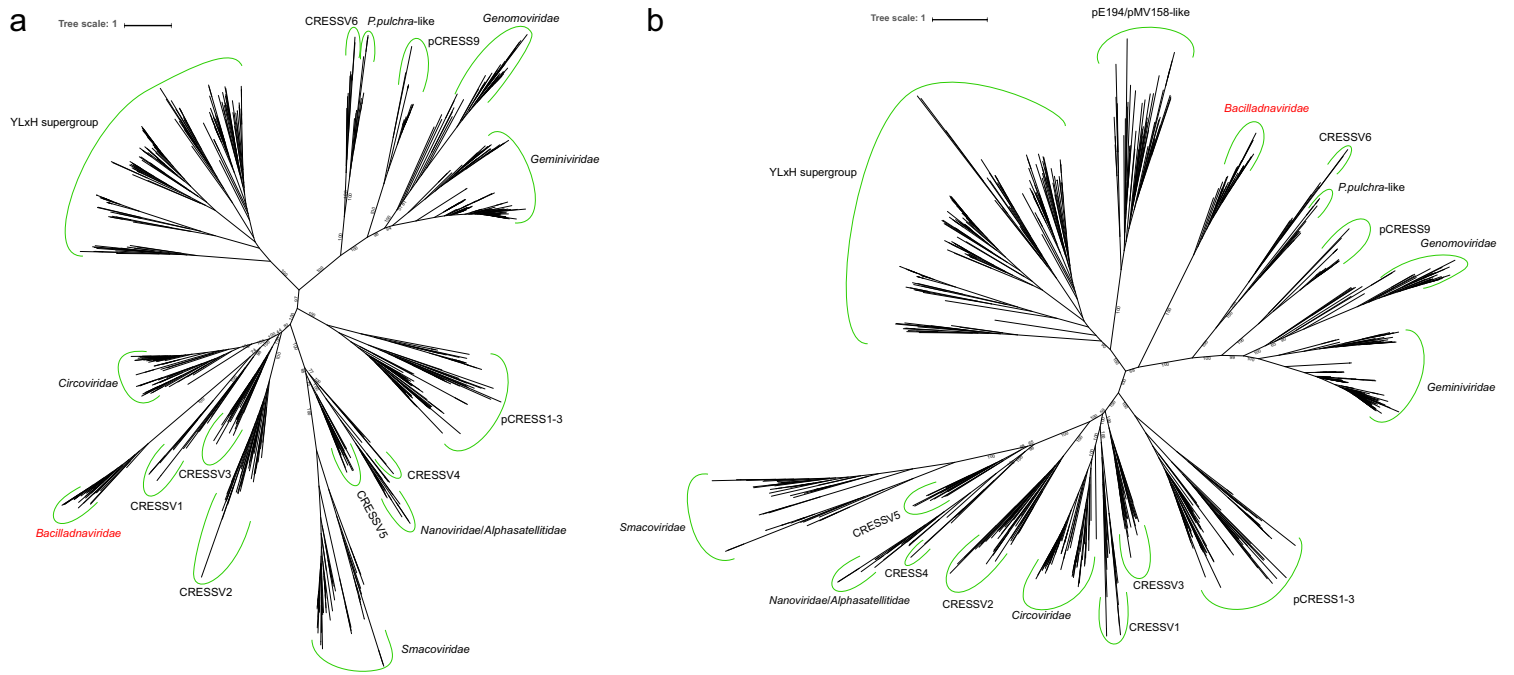

**Supplementary figure 6.** Maximum likelihood phylogenetic trees of Rep proteins using different sequence sampling: a) pE194/pMV158 cluster is absent; b) pE194/pMV158 cluster is present. The trees were constructed using PhyML.



## SUPPLEMENTARY REFERENCES

- 1 Grindley, N. D., Whiteson, K. L. & Rice, P. A. Mechanisms of site-specific recombination. *Annu Rev Biochem* **75**, 567-605 (2006).
- 2 Chen, W., Li, Y. & Wu, Y. F. Molecular characterization and tissue specific copy number of three plasmids from wheat blue dwarf phytoplasma. *J Plant Pathol* **96**, 69-76 (2014).
- 3 George, B. *et al.* Mutational analysis of the helicase domain of a replication initiator protein reveals critical roles of Lys 272 of the B' motif and Lys 289 of the beta-hairpin loop in geminivirus replication. *J Gen Virol* **95**, 1591-1602 (2014).
- 4 Quaiser, A., Krupovic, M., Dufresne, A., Francez, A. & Roux, S. Diversity and comparative genomics of chimeric viruses in Sphagnum-dominated peatlands. *Virus Evol* **2**, vew025 (2016).
- 5 Kazlauskas, D., Varsani, A. & Krupovic, M. Pervasive chimerism in the replication-associated proteins of uncultured single-stranded DNA viruses. *Viruses* **10**, E187 (2018).
- 6 Nash, T. E. *et al.* Functional analysis of a novel motif conserved across geminivirus Rep proteins. *J Virol* **85**, 1182-1192 (2011).
- 7 Varsani, A. & Krupovic, M. Sequence-based taxonomic framework for the classification of uncultured single-stranded DNA viruses of the family Genomoviridae. *Virus Evol* **3**, vew037 (2017).
- 8 Kazlauskas, D. *et al.* Evolutionary history of ssDNA bacilladnaviruses features horizontal acquisition of the capsid gene from ssRNA nodaviruses. *Virology* **504**, 114-121 (2017).
- 9 Quang le, S., Gascuel, O. & Lartillot, N. Empirical profile mixture models for phylogenetic reconstruction. *Bioinformatics* **24**, 2317-2323 (2008).
- 10 Shimodaira, H. An approximately unbiased test of phylogenetic tree selection. *Systematic biology* **51**, 492-508 (2002).
