# Supplementary material for: Multiple origins of prokaryotic and eukaryotic single-stranded DNA viruses from bacterial and archaeal plasmids
Source: Springer Nature journal article supplement (doi:10.1038/s41467-019-11433-0), 2019-07-31
Supplement: 41467_2019_11433_MOESM13_ESM.pdf [file 41467_2019_11433_MOESM13_ESM.pdf]

**Title: Supplementary Data 1.**

- Composition of the 2 superclusters and 2 orphan clusters of HUH endonucleases;
- Accession numbers for the HUH endonucleases depicted in the network shown in Figure 1;
- Composition of the 9 groups of bacterial viral-like Repts;
- Genomic neighborhoods of the integrated plasmids.

**Title: Supplementary Data 2.**

- Sequence alignment used to generate the tree shown in Figure 2A.

**Title: Supplementary Data 3.**

- Sequence alignment used to generate the tree shown in Figure 5.

**Title: Supplementary Data 4.**

- Maximum likelihood tree shown in Figure 2A in newick format.

**Title: Supplementary Data 5.**

- Maximum likelihood tree shown in Figure 5 in newick format.

**Title: Supplementary Data 6.**

- Constrained tree shown in Supplementary figure S5A in newick format.

**Title: Supplementary Data 7.**

- Constrained tree shown in Supplementary figure S5B in newick format.

**Title: Supplementary Data 8.**

- Constrained tree shown in Supplementary figure S5C in newick format.

**Title: Supplementary Data 9.**

- Maximum likelihood tree shown in Supplementary figure S6A in newick format.

**Title: Supplementary Data 10.**

- Maximum likelihood tree shown in Supplementary figure S6B in newick format.
